# Supplementary material for: Development and mixed-methods evaluation of an online animation for young people about genome sequencing
Source: PubMed Central journal article supplement (PMC7316978; doi:10.1038/s41431-019-0564-5), 2020-01-02
Supplement: 41431_2019_564_MOESM5_ESM.pdf [file 41431_2019_564_MOESM5_ESM.pdf]

## QUESTIONNAIRE 1

### Some questions about you

**1. Are you a:**

Boy

Girl

**2. How old are you?**

### Some questions about your understanding of genetics

**3. How would you describe your understanding of genetics?**

None

Some

Good

**4. Have you heard of these words before?**

DNA Yes  No

Gene Yes  No

Chromosome Yes  No

Genome Yes  No

Genome sequencing Yes  No

**5. Do you know what these words mean?**

DNA Yes  No

Gene Yes  No

Chromosome Yes  No

Genome Yes  No

Genome sequencing Yes  No

**Read the following questions and for each one answer True, False or Don't know**

|                                                                                                                                         | True                     | False                    | Don't know               |
|-----------------------------------------------------------------------------------------------------------------------------------------|--------------------------|--------------------------|--------------------------|
| 6. Our DNA is inside our cells                                                                                                          | <input type="checkbox"/> | <input type="checkbox"/> | <input type="checkbox"/> |
| 7. Our DNA doesn't have an effect on how our body works                                                                                 | <input type="checkbox"/> | <input type="checkbox"/> | <input type="checkbox"/> |
| 8. Our complete set of DNA is called our genome                                                                                         | <input type="checkbox"/> | <input type="checkbox"/> | <input type="checkbox"/> |
| 9. Around 1% of our genome is the same as other people's                                                                                | <input type="checkbox"/> | <input type="checkbox"/> | <input type="checkbox"/> |
| 10. Our genome is more similar to our close relatives, like our mum and dad, than it is with other people's                             | <input type="checkbox"/> | <input type="checkbox"/> | <input type="checkbox"/> |
| 11. Genome sequencing involves looking at all the DNA in a person's genome                                                              | <input type="checkbox"/> | <input type="checkbox"/> | <input type="checkbox"/> |
| 12. A 'glitch' in the genome (like a spelling mistake) can cause a health problem because the body isn't getting the right instructions | <input type="checkbox"/> | <input type="checkbox"/> | <input type="checkbox"/> |
| 13. Genome sequencing can be done on the DNA in a blood sample                                                                          | <input type="checkbox"/> | <input type="checkbox"/> | <input type="checkbox"/> |
| 14. Doctors and scientists know all there is to know about what our genome does                                                         | <input type="checkbox"/> | <input type="checkbox"/> | <input type="checkbox"/> |
| 15. If someone with a health problem has genome sequencing, they will always find helpful information about the cause of the problem    | <input type="checkbox"/> | <input type="checkbox"/> | <input type="checkbox"/> |

## QUESTIONNAIRE 2

### Some questions about the animation

**1. Was the animation easy or hard to understand?**

Very easy

Quite easy

Quite hard

Very hard

**2. The amount of information in the animation was:**

Too much

Too little

The right amount

**3. The length of the animation was:**

Too long

Too short

The right amount

**4. What did you think about the way the animation looked?**

I liked it very much

I quite liked it

I didn't like it

**5. Did you learn anything new?**

Yes

No

Not sure

**6. Would you have found this animation helpful if you were making a decision about having genome sequencing?**

Yes

No

Don't know

## Some questions about your understanding

### 7. How would you describe your understanding of genetics?

None

Some

Good

### 8. Have you heard of these words before?

DNA Yes  No

Gene Yes  No

Chromosome Yes  No

Genome Yes  No

Genome sequencing Yes  No

### 9. Do you know what these words mean?

DNA Yes  No

Gene Yes  No

Chromosome Yes  No

Genome Yes  No

Genome sequencing Yes  No

## Read the following questions and for each one answer True, False or Don't know

|                                                           | True                     | False                    | Don't know               |
|-----------------------------------------------------------|--------------------------|--------------------------|--------------------------|
| 10. Our DNA is inside our cells                           | <input type="checkbox"/> | <input type="checkbox"/> | <input type="checkbox"/> |
| 11. Our DNA doesn't have any effect on how our body works | <input type="checkbox"/> | <input type="checkbox"/> | <input type="checkbox"/> |
| 12. Our complete set of DNA is called our genome          | <input type="checkbox"/> | <input type="checkbox"/> | <input type="checkbox"/> |
| 13. Around 1% of our genome is the same as other people's | <input type="checkbox"/> | <input type="checkbox"/> | <input type="checkbox"/> |

|                                                                                                                                         | True                     | False                    | Don't know               |
|-----------------------------------------------------------------------------------------------------------------------------------------|--------------------------|--------------------------|--------------------------|
| 14. Our genome is more similar to our close relatives, like our mum and dad, than it is with other people's                             | <input type="checkbox"/> | <input type="checkbox"/> | <input type="checkbox"/> |
| 15. Genome sequencing involves looking at all the DNA in a person's genome                                                              | <input type="checkbox"/> | <input type="checkbox"/> | <input type="checkbox"/> |
| 16. A 'glitch' in the genome (like a spelling mistake) can cause a health problem because the body isn't getting the right instructions | <input type="checkbox"/> | <input type="checkbox"/> | <input type="checkbox"/> |
| 17. Genome sequencing can be done on the DNA in a blood sample                                                                          | <input type="checkbox"/> | <input type="checkbox"/> | <input type="checkbox"/> |
| 18. We know all there is to know about what our genome does                                                                             | <input type="checkbox"/> | <input type="checkbox"/> | <input type="checkbox"/> |
| 19. If someone with a health problem has genome sequencing, they will always find helpful information about the cause of the problem    | <input type="checkbox"/> | <input type="checkbox"/> | <input type="checkbox"/> |

### Some questions about your attitude to genome sequencing

**20. Imagine you had a health problem and your doctor suggested genome sequencing to understand more about the cause of your condition. Would you want to have genome sequencing?**

Yes

No

Not sure

I would want more information before I made a decision

**21. I feel I understand the benefits of genome sequencing**

Agree

Disagree

Not sure

**22. I feel I understand the limitations of genome sequencing (what it can't do)**

Agree

Disagree

Not sure

**23. I feel the decision to have / not have genome sequencing would be easy for me to make**

Agree

Disagree

Not sure

**Think about genome sequencing and answer the questions according to how you feel**

**24. Genome sequencing is:**

A bad thing

A good thing

Neither

**25. Genome sequencing is:**

Harmful

Helpful

Neither

**26. Genome sequencing is:**

Boring

Interesting

Neither

***Finally, in your own words, let us know what you thought of the animation and if there is any other information you would have liked in it:***

**That is the end of the questionnaire. Thank you for taking part in this study!**
